# Supplementary material for: Dynamic changes in binding interaction networks of sex steroids establish their non-classical effects
Source: PubMed Central journal article supplement (PMC5665952; doi:10.1038/s41598-017-14840-9), 2017-11-01
Supplement: 41598_2017_14840_MOESM1_ESM.pdf [file 41598_2017_14840_MOESM1_ESM.pdf]

# Supplementary Information

## **Dynamic changes in binding interaction networks of sex steroids establish their non-classical effects**

*Mónika Bálint<sup>1,2,†</sup>, Norbert Jeszenői<sup>3,†</sup>, István Horváth<sup>4</sup>, István M. Ábrahám<sup>3,\*</sup>, Csaba Hetényi<sup>1,\*</sup>*

\*Corresponding authors.

[istvan.abraham@aok.pte.hu](mailto:istvan.abraham@aok.pte.hu)

[csabahete@yahoo.com](mailto:csabahete@yahoo.com)

†Equal contribution.

<sup>1</sup>Department of Pharmacology and Pharmacotherapy, University of Pécs, Szigeti út 12, 7624 Pécs, Hungary.

<sup>2</sup>Department of Biochemistry, Eötvös Loránd University, Pázmány Péter sétány 1/C, 1117 Budapest, Hungary.

<sup>3</sup>MTA NAP-B Molecular Neuroendocrinology Group, Institute of Physiology, Szentágothai Research Center, Center for Neuroscience, University of Pécs, Szigeti út 12, 7624 Pécs, Hungary.

<sup>4</sup>Chemistry Doctoral School, University of Szeged, Dugonics tér 13, 6720 Szeged, Hungary.

## Supplementary Figures

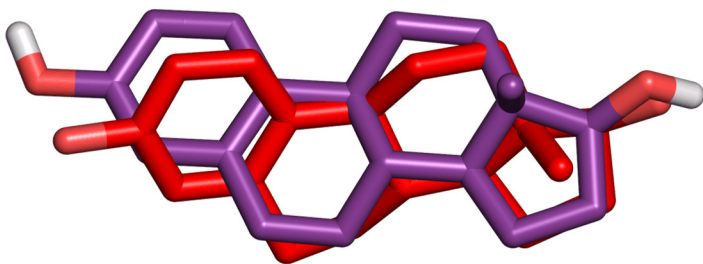

**Supplementary Figure S1** Conformation of E2 obtained with blind docking (magenta) compared to the reference structure (red), from X-ray structure (1gwr).

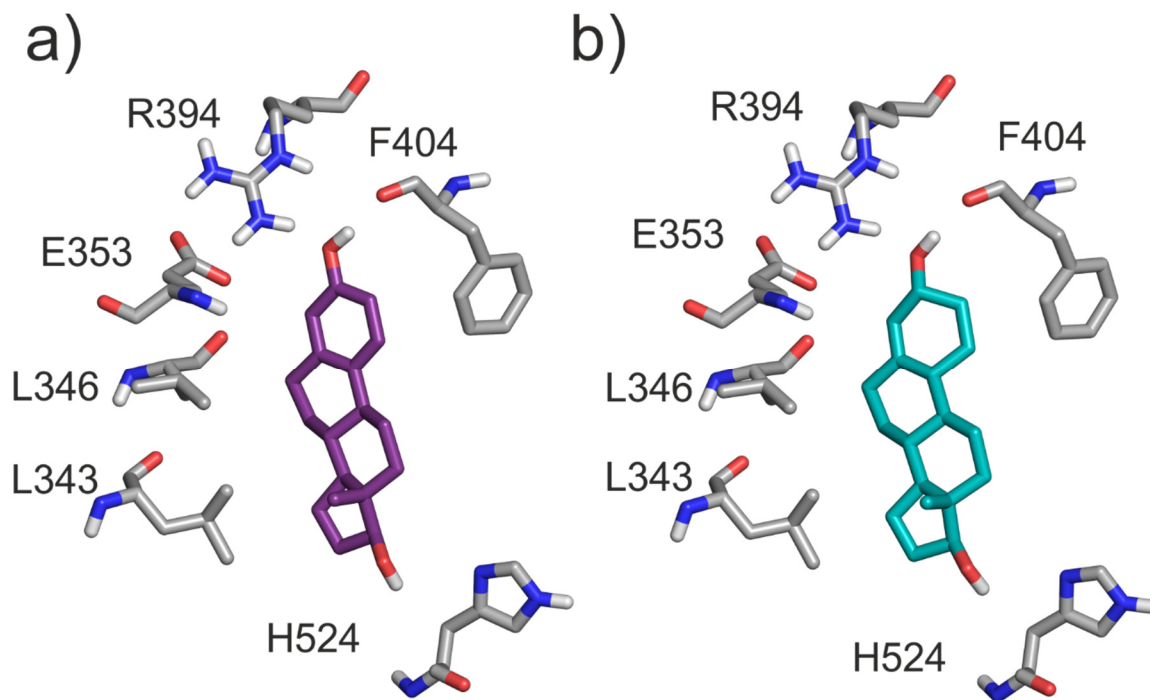

**Supplementary Figure S2** Binding conformations of E2 (a, magenta) and EN (b, teal) in CBS are presented. The main interacting amino acids are in sticks with grey carbon atoms. In contrast with ABS (Fig. 4, main text), the two molecules (E2 and EN) bind to CBS in a similar orientation.

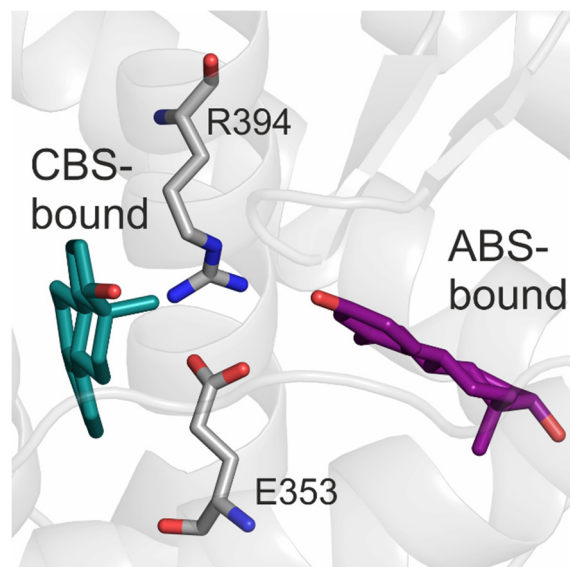

**Supplementary Figure S3** Docked conformations of E2 are presented in magenta (ABS) and teal (CBS). The two binding sites are separated by R394 and E353.

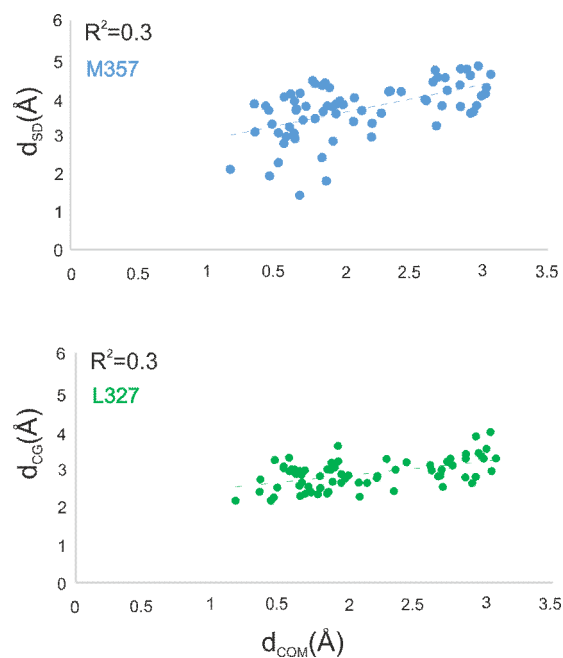

**Supplementary Figure S4** Correlations observed in simulations with EN, case CA-. Similarly to the main text, points were taken until the ligand reached the  $d_{LIM}$  dissociation criteria, which was 70 ns in this case. Correlations are plotted for the movements of L327 and H357. Although the correlation is not as strong as observed in CA+ scenario described in the main text, the role of both M357 and L327 appears to be important in ligand dissociation, even without the presence of CA.

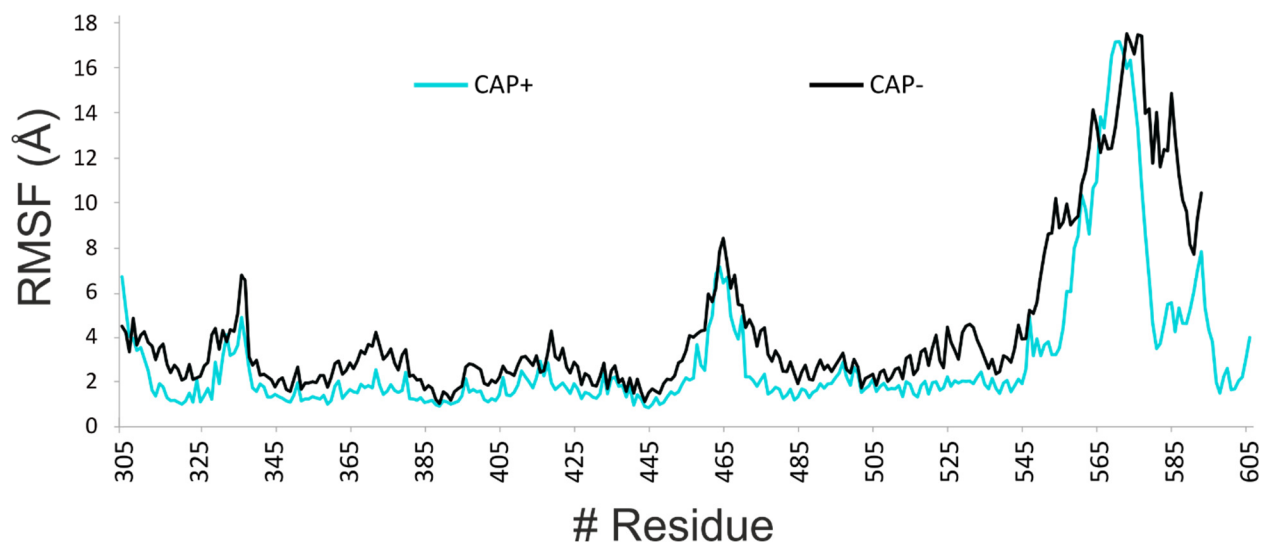

**Supplementary Figure S5** RMSF of 3q95 during 1 $\mu$ s ligand-free CA- and CA + simulations. RMSF was calculated and presented in the same way as in Fig. 3 of the main text. Similarly to Fig. 3, high RMSF values were observed in L1, L2 and in the F domain. The above-presented similarities in the RMSF between 3q95 and 2b23 demonstrates that the two crystallographic structures have a similar dynamic behaviour in addition to their excellent structural alignment of 0.5 Å (Methods).

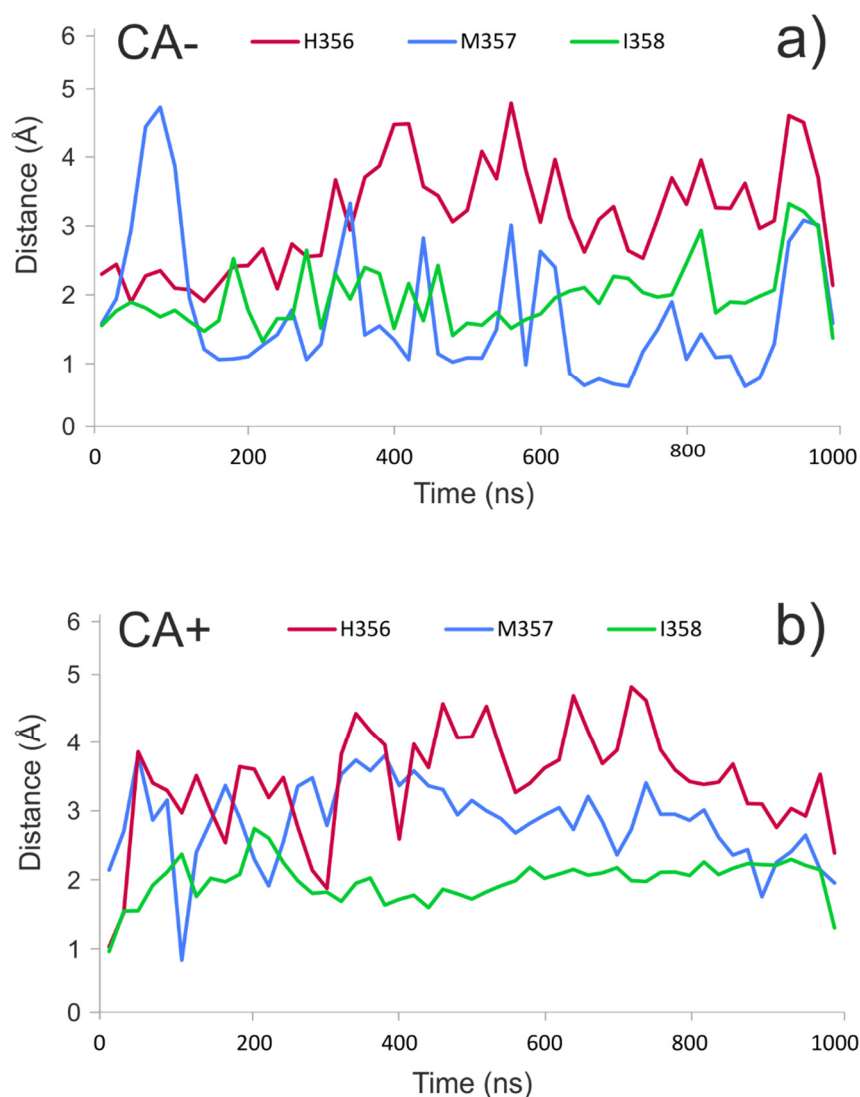

**Supplementary Figure S6** Distances of actual positions of M357 (SD), H356 (CE1), and I358 (CG) sidechain atoms calculated from their initial positions during ligand-free simulations CA- (a) and CA+ (b) (PDB structure 3q95). The calculations were performed in the same way as presented in Methods of the main text. In the CA- simulations (a), it can be observed that H356 is the most mobile residue among the three analyzed, I358 and M357 have high mobility explained by the absence of the restraining factor CA (see main text, Section 1). In CA+ (b) simulations, the mobility of I358 decreases due to the presence of CA, similarly to Fig. 3 and its distance from the initial position remains constant. On the other hand, an increase in the distances is observed for H356 and M357, the two amino acids that switch inside the ABS, in the presence of CA. The above observations support the proposed mechanism and the observations presented in the main text (Fig. 3).

## Supplementary Tables

**Supplementary Table S1** Ranks obtained from blind docking of E2 and EN to hER $\alpha$

| #Rank | $\Delta G_{\text{scoring}}$ (kcal/mol)* |       |
|-------|-----------------------------------------|-------|
|       | E2                                      | EN    |
| 1     | -8.16                                   | -8.75 |
| 2     | -7.56                                   | -8.1  |
| 3     | -6.69                                   | -6.56 |
| 4     | -6.54                                   | -6.56 |
| 5     | -6.18                                   | -6.07 |
| 6     | -6.15                                   | -5.66 |
| 7     | -5.96                                   | -     |
| 8     | -5.67                                   | -     |
| 9     | -5.64                                   | -     |
| 10    | -5.01                                   | -     |
| 11    | -4.88                                   | -     |

\*The ranks are ordered by their AutoDock 4.2 scoring values.

**Supplementary Table S2** Residence frequency values for EN calculated using RMSD

|           |            |             |            |             |            |            |             |             |
|-----------|------------|-------------|------------|-------------|------------|------------|-------------|-------------|
| CA        | +          |             | -          |             | +          | -          | -           | -           |
| ABS       | +          |             | +          |             | +          |            | -           |             |
| CBS       | +          |             | +          |             | -          |            | +           |             |
| seed1     | <b>2.7</b> | <b>10.0</b> | 10.0       | 10.0        | 5.6        | 1.9        | <b>10.0</b> | 10.0        |
| seed2     | 0.8        | 6.6         | 2.6        | 10.0        | 1.7        | <b>6.2</b> | 10.0        | 1.8         |
| seed3     | 3.6        | 10.0        | 7.6        | 10.0        | 6.7        | 3.2        | 10.0        | <b>10.0</b> |
| seed4     | 1.4        | 10.0        | <b>7.0</b> | <b>10.0</b> | <b>6.4</b> | 6.0        | 5.5         | 10.0        |
| seed5     | 2.0        | 10.0        | 6.5        | 10.0        | 10.0       | 2.3        | 10.0        | 10.0        |
|           |            |             |            |             |            |            |             |             |
| all seeds | 2.1        | 9.3         | 6.7        | 10.0        | 6.1        | 3.9        | 9.1         | 8.4         |

\*Bold numbers represent the simulations with RF values closest to the average RF.

**Supplementary Table S3** Residence frequency values for EN calculated using  $d_{COM}$ 

|           |            |             |            |             |            |            |             |             |
|-----------|------------|-------------|------------|-------------|------------|------------|-------------|-------------|
| CAP       | +          |             | -          |             | +          | -          | +           | -           |
| ABS       | +          |             | +          |             | +          |            | -           |             |
| CBS       | +          |             | +          |             | -          |            | +           |             |
| seed1     | <b>2.7</b> | <b>10.0</b> | 10.0       | 10.0        | 6.6        | 2.3        | <b>10.0</b> | 10.0        |
| seed2     | 0.8        | 6.6         | 3.8        | 10.0        | 6.3        | <b>6.3</b> | 10.0        | 1.8         |
| seed3     | 5.9        | 10.0        | 7.6        | 10.0        | 10.0       | 9.6        | 10.0        | <b>10.0</b> |
| seed4     | 1.5        | 10.0        | <b>7.0</b> | <b>10.0</b> | <b>7.0</b> | 9.1        | 5.4         | 10.0        |
| seed5     | 2.0        | 10.0        | 8.3        | 10.0        | 10.0       | 5.1        | 10.0        | 10.0        |
|           |            |             |            |             |            |            |             |             |
| all seeds | 2.6        | 9.3         | 7.2        | 10.0        | 8.0        | 6.5        | 9.1         | 8.4         |

\*Bold numbers represent the simulations with RF values closest to the average RF. These simulations were selected as reference, and used to present results in Table 2 and 3 of the main text.

**Supplementary Table S4** Residence frequency values for E2 calculated using RMSD

|           |            |             |            |             |            |            |             |             |
|-----------|------------|-------------|------------|-------------|------------|------------|-------------|-------------|
| CAP:      | +          |             | -          |             | +          | -          | +           | -           |
| ABS       | +          |             | +          |             | +          |            | -           |             |
| CBS       | +          |             | +          |             | -          |            | +           |             |
| seed1     | 0.7        | 10.0        | 10.0       | 10.0        | 0.9        | 0.1        | <b>10.0</b> | <b>10.0</b> |
| seed2     | 0.7        | 10.0        | 10.0       | 10.0        | <b>2.2</b> | 4.1        | 10.0        | 10.0        |
| seed3     | 0.2        | 10.0        | 0.3        | 10.0        | 0.2        | 0.2        | 10.0        | 10.0        |
| seed4     | <b>1.1</b> | <b>10.0</b> | <b>2.3</b> | <b>10.0</b> | 0.1        | <b>1.4</b> | 10.0        | 10.0        |
| seed5     | 1.3        | 10.0        | 0.7        | 10.0        | 0.1        | 0.1        | 10.0        | 10.0        |
|           |            |             |            |             |            |            |             |             |
| all seeds | 0.8        | 10.0        | 4.6        | 10.0        | 0.7        | 1.2        | 10.0        | 10.0        |

\*Bold numbers represent the simulations with RF values closest to the average RF.

**Supplementary Table S5** Residence frequency values for E2 calculated using  $d_{COM}$ 

|           |             |             |            |             |            |            |             |             |
|-----------|-------------|-------------|------------|-------------|------------|------------|-------------|-------------|
| CAP:      | +           |             | -          |             | +          | -          | +           | -           |
| ABS       | +           |             | +          |             | +          |            | -           |             |
| CBS       | +           |             | +          |             | -          |            | -           |             |
| seed1     | 1.03        | 10.0        | 10.0       | 10.0        | 8.7        | 0.1        | <b>10.0</b> | <b>10.0</b> |
| seed2     | 0.74        | 10.0        | 10.0       | 10.0        | <b>5.3</b> | 9.5        | 10.0        | 10.0        |
| seed3     | 3.56        | 10.0        | 2.2        | 10.0        | 0.3        | 0.2        | 10.0        | 10.0        |
| seed4     | <b>1.74</b> | <b>10.0</b> | <b>2.7</b> | <b>10.0</b> | 0.1        | <b>1.7</b> | 10.0        | 10.0        |
| seed5     | 1.72        | 10.0        | 0.8        | 10.0        | 0.1        | 0.1        | 10.0        | 10.0        |
|           |             |             |            |             |            |            |             |             |
| all seeds | 1.76        | 10.0        | 5.1        | 10.0        | 2.9        | 2.3        | 10.0        | 10.0        |

\*Bold numbers represent the simulations with RF values closest to the average RF. These simulations were selected as reference, and used to present results in Table 2 and 3 of the main text.



**Supplementary Table S6** Simulation times corresponding to  $d_{\text{COM}} \geq 5 \text{ \AA}$  and  $d_{\text{COM}} \geq 10 \text{ \AA}$  values

| $d_{\text{COM}}$ | Time (ns) |      |      |      |     |
|------------------|-----------|------|------|------|-----|
|                  |           | EN   |      | E2   |     |
|                  |           | CA+  | CA-  | CA+  | CA- |
| 5                | $t_2$     | 27.2 | 70.3 | 4.1  | 6.2 |
| 10               | $t_3$     | 40.0 | 89.9 | 96.7 | -   |

**Supplementary Table S7** Velocity ( $\text{\AA}/\text{ns}$ ) values of EN and E2, during CA-/ABS+/CBS+ and CA+/ABS+/CBS+ simulations

| Velocity ( $\text{\AA}/\text{ns}$ ) |               |      |      |      |      |
|-------------------------------------|---------------|------|------|------|------|
| v                                   | Time interval | EN   |      | E2   |      |
|                                     |               | CA+  | CA-  | CA+  | CA-  |
| $v_1$                               | $t_2-t_1$     | 0.18 | 0.07 | 1.22 | 0.81 |
| $v_2$                               | $t_3-t_2$     | 0.39 | 0.26 | 0.10 | -    |
| $v_3$                               | $t_3-t_1$     | 0.25 | 0.11 | 0.05 | -    |

**Supplementary Table S8** List of hER $\alpha$  structures in the PDB

| PDB code | Method | Resolution( $\text{\AA}$ ) | Residues |
|----------|--------|----------------------------|----------|
| 1A52     | X-ray  | 2.8                        | 297-554  |
| 1AKF     | model  | -                          | 309-547  |
| 1ERE     | X-ray  | 3.1                        | 301-553  |
| 1ERR     | X-ray  | 2.6                        | 301-553  |
| 1G50     | X-ray  | 2.9                        | 304-550  |
| 1GWQ     | X-ray  | 2.45                       | 301-548  |
| 1GWR     | X-ray  | 2.4                        | 305-549  |
| 1HCP     | NMR    | -                          | 180-254  |
| 1HCQ     | X-ray  | 2.4                        | 180-262  |
| 1L2I     | X-ray  | 1.95                       | 297-554  |
| 1PCG     | X-ray  | 2.7                        | 304-547  |
| 1QKT     | X-ray  | 2.2                        | 304-551  |
| 1QKU     | X-ray  | 3.2                        | 301-550  |
| 1R5K     | X-ray  | 2.7                        | 297-554  |
| 1SJ0     | X-ray  | 1.9                        | 307-554  |
| 1UOM     | X-ray  | 2.28                       | 301-553  |
| 1X7E     | X-ray  | 2.8                        | 305-549  |
| 1X7R     | X-ray  | 2                          | 305-549  |
| 1XP1     | X-ray  | 1.8                        | 307-554  |
| 1XP6     | X-ray  | 1.7                        | 307-554  |
| 1XP9     | X-ray  | 1.8                        | 307-554  |
| 1XPC     | X-ray  | 1.6                        | 307-554  |
| 1XQC     | X-ray  | 2.05                       | 301-553  |
| 1YIM     | X-ray  | 1.9                        | 307-554  |
| 1YIN     | X-ray  | 2.2                        | 307-554  |
| 1ZKY     | X-ray  | 2.25                       | 298-554  |
| 2AYR     | X-ray  | 1.9                        | 304-551  |
| 2B1V     | X-ray  | 1.8                        | 298-554  |
| 2B1Z     | X-ray  | 1.78                       | 298-554  |
| 2B23     | X-ray  | 2.1                        | 298-554  |
| 2BJ4     | X-ray  | 2                          | 305-533  |
| 2FAI     | X-ray  | 2.1                        | 298-554  |
| 2G44     | X-ray  | 2.65                       | 298-554  |
| 2G5O     | X-ray  | 2.3                        | 298-554  |
| 2IOJ     | X-ray  | 2.9                        | 304-547  |
| 2IOG     | X-ray  | 1.6                        | 309-554  |
| 2IOK     | X-ray  | 2.4                        | 301-554  |
| 2JF9     | X-ray  | 2.1                        | 304-533  |
| 2JFA     | X-ray  | 2.55                       | 304-533  |

| PDB code | Method | Resolution(Å) | Residues |
|----------|--------|---------------|----------|
| 2LLO     | NMR    | -             | 287-305  |
| 2OCF     | X-ray  | 2.95          | 298-595  |
| 2OUZ     | X-ray  | 2             | 301-553  |
| 2P15     | X-ray  | 1.94          | 298-554  |
| 2POG     | X-ray  | 1.84          | 304-551  |
| 2Q6J     | X-ray  | 2.7           | 298-554  |
| 2Q70     | X-ray  | 1.95          | 304-551  |
| 2QA6     | X-ray  | 2.6           | 298-554  |
| 2QA8     | X-ray  | 1.85          | 298-554  |
| 2QAB     | X-ray  | 1.89          | 298-554  |
| 2QE4     | X-ray  | 2.4           | 304-551  |
| 2QGT     | X-ray  | 2.15          | 298-554  |
| 2QGW     | X-ray  | 2.39          | 298-554  |
| 2QH6     | X-ray  | 2.7           | 298-554  |
| 2QR9     | X-ray  | 2             | 298-554  |
| 2QSE     | X-ray  | 1.85          | 298-554  |
| 2QXM     | X-ray  | 2.3           | 298-554  |
| 2QXS     | X-ray  | 1.7           | 298-554  |
| 2QZO     | X-ray  | 1.72          | 298-554  |
| 2R6W     | X-ray  | 2             | 304-551  |
| 2R6Y     | X-ray  | 2             | 304-551  |
| 2YAT     | X-ray  | 2.6           | 301-551  |
| 2YJA     | X-ray  | 1.82          | 299-551  |
| 3CBM     | X-ray  | 1.69          | 298-307  |
| 3CBO     | X-ray  | 1.65          | 298-307  |
| 3CBP     | X-ray  | 1.42          | 298-307  |
| 3DT3     | X-ray  | 2.4           | 299-551  |
| 3ERD     | X-ray  | 2.03          | 297-554  |
| 3ERT     | X-ray  | 1.9           | 297-554  |
| 3HLV     | X-ray  | 3             | 298-550  |
| 3HM1     | X-ray  | 2.33          | 298-550  |
| 3L03     | X-ray  | 1.9           | 298-550  |
| 3OS8     | X-ray  | 2.03          | 299-553  |
| 3OS9     | X-ray  | 2.3           | 299-553  |
| 3OSA     | X-ray  | 2.3           | 299-553  |
| 3Q95     | X-ray  | 2.05          | 298-554  |
| 3Q97     | X-ray  | 2.1           | 298-554  |
| 3UU7     | X-ray  | 2.2           | 302-552  |
| 3UUA     | X-ray  | 2.05          | 302-552  |
| 3UUC     | X-ray  | 2.1           | 302-552  |
| 3UUD     | X-ray  | 1.6           | 302-552  |

| PDB code | Method | Resolution(Å) | Residues |
|----------|--------|---------------|----------|
| 4AA6     | X-ray  | 2.6           | 182-252  |
| 4DMA     | X-ray  | 2.3           | 303-549  |
| 4IU7     | X-ray  | 2.29          | 303-549  |
| 4IUI     | X-ray  | 2.3           | 303-549  |
| 4IV2     | X-ray  | 2.14          | 303-549  |
| 4IV4     | X-ray  | 2.3           | 303-549  |
| 4IVW     | X-ray  | 2.06          | 303-549  |
| 4IVY     | X-ray  | 1.95          | 303-549  |

## **Supplementary Video legends**

### **Supplementary Video 1**

*The three-dimensional structure of the hER $\alpha$ , with important structural elements highlighted in red. ABS and CBS binding sites are also presented in the video.*

### **Supplementary Video 2**

*An example 100-ns-long molecular dynamics (MD) simulation of EN dissociation from the ABS. The simulation started from a CA+/CBS+/ABS+ starting complex (Fig. 1). Disruption of H-bonds with K449, and L327 can be observed at 25 and 30 ns, respectively.*

### **Supplementary Video 3**

*The three-dimensional structure of the flickering gate is composed by T1, L1, and H3 structural elements. Its closed (blue) and opened (red) states show considerable differences at T1 and L1 conformations. EN is presented with red (ABS-bound) and blue (unbound) sticks.*
